# Supplementary material for: Very weak interactions: structures, energies and bonding in the tetramers and pentamers of hydrogen sulfide
Source: Royal Society of Chemistry journal article supplement (doi:10.1039/c4ra09430a), 2014-10-29
Supplement: c4ra09430a1.pdf [file c4ra09430a1.pdf]

| Aug 19, 14 16:53                                                                                               |             | si.txt      |             | Page 1/7 |
|----------------------------------------------------------------------------------------------------------------|-------------|-------------|-------------|----------|
| Very Weak Interactions: Structures, Energies and Bonding<br>in the Tetramers and Pentamers of Hydrogen Sulfide |             |             |             |          |
| César Ibargüen, Doris Guerra, C.Z. Hadad, Albeiro Restrepo<br>Universidad de Antioquia, Medellín Colombia      |             |             |             |          |
| Optimized geometries at the MP2/6-311++G** level                                                               |             |             |             |          |
| -----                                                                                                          |             |             |             |          |
| Tetramers                                                                                                      |             |             |             |          |
| T1                                                                                                             |             |             |             |          |
| S                                                                                                              | -1.74581813 | 0.35309603  | -1.80497714 |          |
| S                                                                                                              | 1.95043515  | -1.34427310 | -0.94453907 |          |
| S                                                                                                              | 0.84104007  | 2.14038516  | 0.72772506  |          |
| S                                                                                                              | -1.04315708 | -1.19194809 | 1.82804614  |          |
| H                                                                                                              | -2.44463718 | -0.31868002 | -0.88774607 |          |
| H                                                                                                              | -1.36906010 | 1.27660010  | -0.91741607 |          |
| H                                                                                                              | 2.49483719  | -0.16761101 | -0.62803505 |          |
| H                                                                                                              | 0.95355507  | -0.76160806 | -1.61611512 |          |
| H                                                                                                              | 0.40268603  | 1.28740710  | 1.65646813  |          |
| H                                                                                                              | 0.86821307  | 3.16664824  | 1.57948812  |          |
| H                                                                                                              | -0.04101200 | -1.70680213 | 1.11055309  |          |
| H                                                                                                              | -0.90457207 | -2.09211416 | 2.80271221  |          |
| T2                                                                                                             |             |             |             |          |
| S                                                                                                              | 2.28369417  | 2.19336217  | -0.10253101 |          |
| S                                                                                                              | 2.85544522  | -1.82894414 | -0.46263104 |          |
| S                                                                                                              | -0.69537805 | -0.34179003 | 0.98605607  |          |
| S                                                                                                              | -4.54563535 | 0.05136300  | -0.48225604 |          |
| H                                                                                                              | 2.23660517  | 2.58825320  | -1.37571011 |          |
| H                                                                                                              | 2.88629222  | 1.04280108  | -0.41306503 |          |
| H                                                                                                              | 1.67751013  | -1.74456113 | 0.16151301  |          |
| H                                                                                                              | 3.42817026  | -2.44439419 | 0.57302204  |          |
| H                                                                                                              | 0.05628800  | 0.73955006  | 0.75798106  |          |
| H                                                                                                              | -0.78817206 | -0.08394601 | 2.29172017  |          |
| H                                                                                                              | -4.57578135 | -1.19143509 | -0.96545007 |          |
| H                                                                                                              | -3.29092025 | -0.09013601 | -0.04822300 |          |
| T3                                                                                                             |             |             |             |          |
| S                                                                                                              | -0.53211604 | -0.57167605 | 1.47979611  |          |
| S                                                                                                              | 2.69538620  | -1.72658313 | -0.69485205 |          |
| S                                                                                                              | 1.88653214  | 2.27978417  | -0.18322601 |          |
| S                                                                                                              | -4.02059031 | 0.08707001  | -0.64779405 |          |
| H                                                                                                              | -1.62914512 | -0.30983102 | 0.76458506  |          |
| H                                                                                                              | -0.00281400 | 0.62901705  | 1.23146909  |          |
| H                                                                                                              | 3.36426526  | -2.33545718 | 0.28553202  |          |
| H                                                                                                              | 1.56285412  | -1.69709713 | 0.01397400  |          |
| H                                                                                                              | 2.94515923  | 2.72436821  | 0.49557404  |          |
| H                                                                                                              | 2.49366719  | 1.13124609  | -0.49409004 |          |
| H                                                                                                              | -5.02440238 | -0.42956203 | 0.06227100  |          |
| H                                                                                                              | -4.17698832 | -0.81020706 | -1.62210612 |          |
| T4                                                                                                             |             |             |             |          |
| S                                                                                                              | 2.92231622  | -0.02927900 | 0.85682007  |          |
| H                                                                                                              | 2.35180318  | -1.06075508 | 1.47853711  |          |
| H                                                                                                              | 3.50089527  | 0.41129503  | 1.97608615  |          |
| S                                                                                                              | 0.26692202  | -1.72737313 | -1.06250308 |          |
| H                                                                                                              | -0.03192300 | -2.99344323 | -1.35774010 |          |
| H                                                                                                              | -0.86583007 | -1.54942412 | -0.37713503 |          |
| S                                                                                                              | -3.06305123 | -0.29174102 | 0.83250806  |          |
| H                                                                                                              | -2.33016318 | 0.76544806  | 0.47121804  |          |
| H                                                                                                              | -2.92862423 | -0.01891200 | 2.13133916  |          |
| S                                                                                                              | -0.15797301 | 2.14220316  | -0.76353306 |          |
| H                                                                                                              | -0.06357700 | 1.45905711  | -1.90581014 |          |
| H                                                                                                              | 0.87601407  | 1.48577112  | -0.22916702 |          |
| T5                                                                                                             |             |             |             |          |
| S                                                                                                              | -2.87013324 | 0.07016090  | -0.17947386 |          |

| Aug 19, 14 16:53 |             | si.txt      |             | Page 2/7 |
|------------------|-------------|-------------|-------------|----------|
| H                | -3.48501919 | 0.38394267  | 0.96186323  |          |
| H                | -2.02223036 | 1.09840127  | -0.07957985 |          |
| S                | -0.07016575 | -2.87009216 | 0.17950617  |          |
| H                | -0.38386236 | -3.48514455 | -0.96176392 |          |
| H                | -1.09844947 | -2.02226005 | 0.07946016  |          |
| S                | 2.87013111  | -0.07016589 | -0.17939486 |          |
| H                | 3.48502315  | -0.38392869 | 0.96194422  |          |
| H                | 2.02224018  | -1.09841432 | -0.07948785 |          |
| S                | 0.07016270  | 2.87010518  | 0.17936517  |          |
| H                | 1.09844432  | 2.02225108  | 0.07947816  |          |
| H                | 0.38393664  | 3.48502417  | -0.96195592 |          |
| T6               |             |             |             |          |
| S                | 0.27263202  | -2.82935421 | -0.07431801 |          |
| S                | -2.91960322 | -0.26801402 | -0.08587101 |          |
| S                | -0.27273102 | 2.82929822  | 0.07561501  |          |
| S                | 2.91976822  | 0.26797102  | 0.08456401  |          |
| H                | -0.84732007 | -2.10239716 | -0.02239900 |          |
| H                | 0.04032200  | -3.38332326 | 1.11657609  |          |
| H                | -3.50097327 | -0.00036400 | 1.08460908  |          |
| H                | -2.17304316 | 0.83912406  | -0.03843800 |          |
| H                | 0.84695707  | 2.10195016  | 0.02346800  |          |
| H                | -0.03937100 | 3.38477726  | -1.11436908 |          |
| H                | 2.17282217  | -0.83892507 | 0.03752500  |          |
| H                | 3.49953627  | 0.00075600  | -1.08681108 |          |
| T7               |             |             |             |          |
| S                | 3.37271226  | -0.25575302 | -0.44464403 |          |
| H                | 3.47558026  | -0.15494801 | -1.77063914 |          |
| S                | 2.39314218  | 0.65037905  | -0.39126303 |          |
| H                | -0.04560600 | -1.60636512 | 0.56344204  |          |
| H                | -0.83734406 | -2.24017817 | 1.43045911  |          |
| H                | 1.03211108  | -2.30529018 | 0.92023207  |          |
| S                | -3.40792826 | -0.18727601 | -0.50188204 |          |
| H                | -2.36880018 | 0.64147905  | -0.37476403 |          |
| H                | -2.68903720 | -1.05501508 | -1.21611810 |          |
| S                | 0.01067500  | 2.01276815  | 0.33365703  |          |
| H                | 0.09112801  | 1.72138713  | 1.63192312  |          |
| H                | 0.02557400  | 3.32819526  | 0.56101104  |          |
| T8               |             |             |             |          |
| S                | -0.16786633 | 2.88034940  | 0.03236834  |          |
| S                | -2.88957562 | -0.17488692 | -0.17477638 |          |
| S                | 0.16845013  | -2.84963668 | 0.19259951  |          |
| S                | 2.88751905  | 0.16030895  | -0.18587111 |          |
| H                | 0.90616671  | 2.08581013  | -0.00913538 |          |
| H                | 0.11441773  | 3.29000587  | 1.26993856  |          |
| H                | -2.12092559 | 0.91400030  | -0.07372092 |          |
| H                | -3.51604583 | 0.08690435  | 0.97331527  |          |
| H                | -0.92474504 | -2.08947765 | 0.07771716  |          |
| H                | -0.09229767 | -3.50768342 | -0.93794608 |          |
| H                | 3.53296489  | -0.10619916 | 0.95064960  |          |
| H                | 2.12402919  | -0.93151657 | -0.07994377 |          |
| T9               |             |             |             |          |
| S                | -1.66574113 | 1.34756611  | 1.04255408  |          |
| H                | -2.07347116 | 2.17352016  | 2.00888715  |          |
| H                | 2.63396920  | 0.46456004  | -1.30415510 |          |
| S                | 1.66638713  | 1.34494810  | -1.04466408 |          |
| H                | 2.07630016  | 2.17025817  | -2.01062416 |          |
| S                | -0.37987803 | -0.49946004 | -1.42154911 |          |
| H                | -1.32465210 | -1.44359711 | -1.44184311 |          |
| H                | -2.22765217 | -0.59530804 | -1.93760415 |          |
| S                | 0.37905303  | -0.49778704 | 1.42347211  |          |
| H                | 1.32374510  | -1.44201911 | 1.44392311  |          |
| H                | 2.22771117  | -0.59278305 | 1.93630315  |          |
| H                | -2.63185520 | 0.46665404  | 1.30572410  |          |
| T10              |             |             |             |          |

| Aug 19, 14 16:53 |             | si.txt      |             | Page 3/7 |
|------------------|-------------|-------------|-------------|----------|
| S                | 0.12054201  | 2.09125816  | -0.18890101 |          |
| H                | 0.13917001  | 0.75639706  | -0.11817401 |          |
| H                | 0.74254306  | 2.21684317  | 0.98485007  |          |
| S                | -3.43737026 | -0.04329200 | 0.21120902  |          |
| H                | -2.51384119 | 0.91671207  | 0.12538301  |          |
| H                | -4.21803232 | 0.54296004  | -0.69749305 |          |
| S                | 3.26067525  | -0.11139101 | 0.21223702  |          |
| H                | 3.22480124  | 0.67225005  | -0.86584506 |          |
| H                | 4.53778235  | -0.43980303 | 0.01041500  |          |
| S                | -0.03763000 | -1.91908415 | -0.25634302 |          |
| H                | -1.15577309 | -2.41695519 | 0.27371002  |          |
| H                | 0.74385806  | -2.52826119 | 0.63592905  |          |
| T11              |             |             |             |          |
| S                | 0.00079600  | 2.11227016  | 0.94574807  |          |
| H                | 0.00088200  | 2.09169816  | -0.38859203 |          |
| H                | -0.00422500 | 0.77697506  | 1.00962208  |          |
| S                | 0.00135100  | -1.95971315 | 0.83171606  |          |
| H                | 0.96786307  | -2.51122619 | 1.56835512  |          |
| H                | -0.96206007 | -2.51216219 | 1.57170812  |          |
| S                | -2.57332320 | -0.04235000 | -0.90184807 |          |
| H                | -3.15755424 | 0.90417407  | -0.16577501 |          |
| H                | -3.72241828 | -0.37386703 | -1.49383512 |          |
| S                | 2.57130619  | -0.04204900 | -0.90264307 |          |
| H                | 3.15809924  | 0.90207907  | -0.16554601 |          |
| H                | 3.71733328  | -0.36821103 | -1.50349411 |          |
| Pentamers        |             |             |             |          |
| -----            |             |             |             |          |
| P1               |             |             |             |          |
| S                | 0.16165306  | 0.26161233  | 2.40459138  |          |
| H                | 0.07943809  | 1.52299183  | 1.97643557  |          |
| H                | 0.11549688  | -0.21615360 | 1.15835742  |          |
| S                | -0.05029015 | -1.92348970 | -0.98523467 |          |
| H                | -1.06456371 | -2.78572736 | -0.89893230 |          |
| H                | 0.86597338  | -2.89134825 | -0.92099507 |          |
| S                | 3.08706476  | -0.24877417 | -0.16785089 |          |
| H                | 3.24122545  | -0.08984977 | 1.14730705  |          |
| H                | 4.37650896  | -0.01961440 | -0.42346419 |          |
| S                | -3.25807836 | -0.28028199 | 0.00475208  |          |
| H                | -2.53823177 | 0.14211838  | 1.04636738  |          |
| H                | -3.71862247 | 0.94496108  | -0.25250008 |          |
| S                | -0.04306426 | 2.23641309  | -1.26520052 |          |
| H                | -0.77293661 | 1.16544814  | -1.58533613 |          |
| H                | 1.05915107  | 1.49950076  | -1.10415777 |          |
| P2               |             |             |             |          |
| S                | 5.03274139  | 0.01994200  | 0.00564800  |          |
| S                | 0.97891308  | 0.52611504  | 0.48482804  |          |
| S                | -2.60321220 | 2.16149917  | -0.51674504 |          |
| S                | -1.49001911 | -1.60861412 | -1.98598315 |          |
| S                | -2.05425416 | -1.07787508 | 1.96562315  |          |
| H                | 5.26347140  | -0.77556506 | -1.03969708 |          |
| H                | 5.54329245  | 1.08147708  | -0.61984005 |          |
| H                | 0.96195407  | -0.01359100 | 1.70463113  |          |
| H                | 2.29927218  | 0.36446703  | 0.35787703  |          |
| H                | -1.39380210 | 2.64873520  | -0.23432902 |          |
| H                | -2.53378319 | 1.27777510  | 0.48258404  |          |
| H                | -2.11753116 | -0.44756303 | -2.18531216 |          |
| H                | -0.51120204 | -1.00749608 | -1.30379010 |          |
| H                | -3.06852623 | -1.58887712 | 2.66551620  |          |
| H                | -2.26987718 | -1.87643114 | 0.91842007  |          |
| P3               |             |             |             |          |
| S                | -3.83745115 | -0.11068513 | -0.75322636 |          |
| H                | -5.12238244 | -0.06382066 | -1.10904302 |          |
| H                | -4.11701162 | -0.73162030 | 0.39370537  |          |
| S                | 2.62271668  | 2.05932663  | -0.77841411 |          |

| Aug 19, 14 16:53 |             | si.txt      |             | Page 4/7 |
|------------------|-------------|-------------|-------------|----------|
| H                | 3.19260304  | 2.89843012  | 0.08784792  |          |
| H                | 1.41484864  | 2.21057166  | -0.22585205 |          |
| S                | -0.95445892 | 1.97566660  | 1.11876289  |          |
| H                | -1.01105947 | 0.65197824  | 0.94184662  |          |
| H                | -2.06276128 | 2.16895671  | 0.40163694  |          |
| S                | 3.16080228  | -1.86773743 | 0.17668948  |          |
| H                | 3.13983214  | -0.57681847 | -0.16943065 |          |
| H                | 3.73962707  | -2.23155007 | -0.96875938 |          |
| S                | -0.90500734 | -2.05754295 | -0.32063204 |          |
| H                | -0.98665125 | -2.14522808 | -1.00747547 |          |
| H                | 0.427733021 | -2.16534289 | 0.30442072  |          |
| P4               |             |             |             |          |
| S                | -0.85231003 | 2.23625323  | 0.19515321  |          |
| H                | -0.85780228 | 0.89896419  | 0.16774709  |          |
| H                | -1.21859749 | 2.26930778  | 1.47764010  |          |
| S                | -0.99526753 | -1.75770556 | -0.08826226 |          |
| H                | 0.24067965  | -2.25533810 | 0.01188449  |          |
| H                | -1.40230271 | -2.32750963 | 1.04678339  |          |
| S                | 3.00921432  | -2.21561335 | 0.17612297  |          |
| H                | 3.11676171  | -0.88977396 | 0.04569873  |          |
| H                | 3.63701461  | -2.43927766 | -0.97923594 |          |
| S                | -4.46546201 | -0.14218888 | -0.08770731 |          |
| H                | -3.95053932 | -0.98500541 | -0.98469792 |          |
| H                | -3.51304899 | 0.76328939  | -0.32127201 |          |
| S                | 3.22026632  | 1.89970755  | -0.13459096 |          |
| H                | 3.35966601  | 2.41413188  | -1.35751364 |          |
| H                | 1.92511171  | 2.22396368  | -0.07848469 |          |
| P5               |             |             |             |          |
| S                | 3.92936830  | -1.42949111 | -0.84764207 |          |
| H                | 4.14481832  | -1.24061710 | -2.15044616 |          |
| H                | 2.60250620  | -1.40270710 | -1.00257208 |          |
| S                | 2.80711821  | 1.89213215  | 1.32442210  |          |
| H                | 3.38040826  | 2.87776922  | 0.63223505  |          |
| H                | 3.54169627  | 0.95703107  | 0.71556906  |          |
| S                | -3.02012623 | -1.38449810 | 1.76409913  |          |
| H                | -3.28481525 | -0.57672204 | 2.79214221  |          |
| H                | -3.64625128 | -0.58718405 | 0.89437507  |          |
| S                | 0.03088000  | -0.27009402 | -0.71610805 |          |
| H                | -0.68271505 | -0.79427906 | 0.28503402  |          |
| H                | 0.60863604  | 0.63609705  | 0.07779401  |          |
| H                | -3.75505628 | 1.11361109  | -1.40676111 |          |
| S                | -4.08413131 | 0.53057404  | -2.56050619 |          |
| H                | -2.45510519 | 0.85347706  | -1.57177012 |          |
| P6               |             |             |             |          |
| S                | -2.15155216 | 2.65109020  | -0.33651503 |          |
| H                | -2.53898819 | 1.37989110  | -0.19339201 |          |
| H                | -2.83885822 | 3.04694623  | 0.73589305  |          |
| S                | 1.84137814  | 2.83582322  | 0.44384503  |          |
| H                | 0.53151404  | 2.77332421  | 0.18494701  |          |
| H                | 2.06903816  | 3.65371328  | -0.58495304 |          |
| S                | 0.19959501  | -3.41630026 | 0.09403101  |          |
| H                | 0.51821004  | -3.70035628 | 1.35763610  |          |
| H                | 1.23294510  | -2.57916920 | -0.03966500 |          |
| S                | -3.24382925 | -1.23986209 | 0.13705001  |          |
| H                | -2.11188316 | -1.94887615 | 0.08635901  |          |
| H                | -3.69864628 | -1.76409713 | -1.00202208 |          |
| S                | 3.33830626  | -0.85469107 | -0.40374103 |          |
| H                | 2.88802622  | 0.36877303  | -0.10869901 |          |
| H                | 4.20627532  | -0.84710707 | 0.60917305  |          |
| P7               |             |             |             |          |
| S                | 1.23938309  | -0.80138206 | -1.10100108 |          |
| H                | 2.48543719  | -0.84559907 | -0.62287405 |          |
| H                | 1.25746710  | 0.52971404  | -1.20868709 |          |
| S                | 0.43034803  | 3.13832824  | -0.32125602 |          |
| H                | -0.52982104 | 3.73506529  | -1.02920708 |          |

| Aug 19, 14 16:53 |             | si.txt      |             | Page 5/7 |
|------------------|-------------|-------------|-------------|----------|
| H                | -0.45351003 | 2.44903519  | 0.40662303  |          |
| S                | -1.68652313 | 0.18339901  | 1.54582412  |          |
| H                | -2.70193021 | -0.29500602 | 0.82229006  |          |
| H                | -0.77817906 | -0.49260404 | 0.83633806  |          |
| S                | -5.00120038 | -1.32544110 | -0.44487503 |          |
| H                | -5.89947245 | -1.56333312 | 0.51181604  |          |
| H                | -5.77567042 | -0.40185003 | -1.01592008 |          |
| S                | 5.11761039  | -1.14449709 | 0.32144502  |          |
| H                | 5.15535339  | -1.68970713 | 1.53806512  |          |
| H                | 5.64643243  | -2.23221517 | -0.24062502 |          |
| P8               |             |             |             |          |
| S                | -3.45154208 | 0.04077523  | -0.09462212 |          |
| H                | -3.50398942 | -0.32894868 | 1.18613277  |          |
| H                | -2.76183431 | 1.14658912  | 0.19369321  |          |
| S                | -0.02612239 | -1.66054459 | -1.52658885 |          |
| H                | -0.38451524 | -2.12938911 | -2.72356680 |          |
| H                | -1.25607909 | -1.21936997 | -1.24558425 |          |
| S                | 3.43334037  | 0.04816414  | -0.16812592 |          |
| H                | 3.16804169  | 1.35510311  | -0.21484778 |          |
| H                | 2.39189329  | -0.24300611 | -0.95092219 |          |
| S                | -0.05409002 | 2.41352839  | -0.32003442 |          |
| H                | -0.03229027 | 1.18325445  | 0.20033958  |          |
| H                | -0.00241347 | 1.94223912  | -1.56770583 |          |
| S                | 0.16579502  | -0.77067303 | 2.20829422  |          |
| H                | -0.11517996 | -2.00653405 | 1.79061444  |          |
| H                | 1.41827233  | -0.83994027 | 1.74908016  |          |
| P9               |             |             |             |          |
| S                | -0.03996100 | 2.32121518  | -0.80155006 |          |
| H                | -1.31539810 | 2.37794718  | -0.41272603 |          |
| H                | -0.25879202 | 1.21465109  | -1.51614812 |          |
| S                | 0.12445201  | -0.57240605 | 2.20925817  |          |
| H                | -1.00089808 | -0.53377904 | 2.92515423  |          |
| H                | -0.11830101 | 0.61250604  | 1.64309913  |          |
| S                | -0.03823700 | -1.93831215 | -1.60723312 |          |
| H                | 1.17266009  | -1.42454111 | -1.83309014 |          |
| H                | 0.14238101  | -1.89224915 | -0.28463402 |          |
| S                | 3.27900625  | 0.11294801  | -0.02393800 |          |
| H                | 3.20430625  | -0.40424103 | 1.20383909  |          |
| H                | 2.43844419  | 1.10253208  | 0.28563102  |          |
| S                | -3.18275024 | 0.05530500  | 0.17780701  |          |
| H                | -4.20420932 | -0.10072701 | -0.66612405 |          |
| H                | -2.34035018 | -0.61208205 | -0.61450105 |          |
| P10              |             |             |             |          |
| S                | 3.09230015  | 0.14454393  | -0.30583966 |          |
| H                | 3.68865496  | -0.16021766 | -1.46024519 |          |
| H                | 2.27608916  | -0.90896646 | -0.38575777 |          |
| S                | 0.15505790  | -0.21008494 | 2.08709555  |          |
| H                | -0.28820643 | -0.58326763 | 3.28910902  |          |
| H                | -1.07885579 | 0.00749587  | 1.62354801  |          |
| S                | -0.07755690 | 2.69581165  | -0.67863159 |          |
| H                | 1.02065085  | 1.94104490  | -0.57087461 |          |
| H                | 0.03266057  | 3.12591473  | 0.57943289  |          |
| S                | -0.00309172 | -2.47645456 | -0.83409362 |          |
| H                | -0.01606952 | -3.57869059 | -1.58698458 |          |
| H                | 0.12848635  | -3.16712405 | 0.29826805  |          |
| S                | -3.23044783 | 0.05178446  | -0.29847670 |          |
| H                | -2.31104002 | 0.97307539  | -0.60233651 |          |
| H                | -2.43255577 | -0.93887313 | -0.70502303 |          |
| P11              |             |             |             |          |
| S                | 3.95755817  | -0.11275968 | -0.15394765 |          |
| H                | 2.94251226  | 0.00768806  | 0.70608734  |          |
| H                | 4.24535659  | 1.18711545  | -0.07176999 |          |
| S                | 0.37461224  | -0.49022212 | -1.65394283 |          |
| H                | -0.45832442 | 0.03959791  | -2.55227300 |          |
| H                | 1.45800864  | -0.00903274 | -2.26448567 |          |

| Aug 19, 14 16:53 |             | si.txt      |             | Page 6/7 |
|------------------|-------------|-------------|-------------|----------|
| S                | -2.64885292 | -1.87687791 | 0.24856226  |          |
| H                | -1.90606488 | -2.59976828 | -0.59183055 |          |
| H                | -1.58281278 | -1.52849496 | 0.97470768  |          |
| S                | -2.09722997 | 2.15149644  | -0.41758671 |          |
| H                | -2.56979998 | 0.90218218  | -0.44536248 |          |
| H                | -3.27124795 | 2.65234267  | -0.02737561 |          |
| S                | 0.47616856  | 0.17089606  | 1.95968865  |          |
| H                | -0.18133901 | 1.17227422  | 1.36968363  |          |
| H                | 0.32761417  | 0.69557088  | 3.17823911  |          |
| P12              |             |             |             |          |
| S                | -3.01179323 | -0.16038001 | -0.57509904 |          |
| H                | -3.44938827 | 0.07521301  | 0.66251105  |          |
| H                | -2.19162617 | 0.89433407  | -0.54974804 |          |
| S                | 0.13064901  | -0.00032800 | 2.10160016  |          |
| H                | 1.10275608  | 0.90702607  | 2.21003017  |          |
| H                | -0.04847900 | -0.05013500 | 3.42316926  |          |
| S                | 0.12090501  | -2.77515121 | -0.42076903 |          |
| H                | -0.95795807 | -1.98586315 | -0.43981203 |          |
| H                | -0.23263402 | -3.38788626 | -1.55277212 |          |
| S                | -0.19379901 | 2.77852021  | -0.45783304 |          |
| H                | 0.13737201  | 3.40832326  | -1.58699412 |          |
| H                | 0.85706807  | 1.95675715  | -0.53930304 |          |
| S                | 2.90092322  | 0.11720401  | -0.73168805 |          |
| H                | 2.07064216  | -0.92861507 | -0.65463605 |          |
| H                | 3.56209327  | -0.24700602 | 0.36818303  |          |
| P13              |             |             |             |          |
| S                | -2.53169519 | -1.98146815 | -0.99207507 |          |
| H                | -1.21785809 | -1.95747315 | -0.75241006 |          |
| H                | -2.82120222 | -2.10450316 | 0.30474002  |          |
| S                | -1.94604615 | 2.02357816  | -1.14113009 |          |
| H                | -2.52388719 | 0.90579807  | -1.58657012 |          |
| H                | -2.55164620 | 2.79145121  | -2.04844616 |          |
| S                | 5.30834643  | -0.08156601 | -0.01467200 |          |
| H                | 5.27713741  | 1.14352209  | 0.51144204  |          |
| H                | 3.97649930  | -0.13368701 | -0.09727201 |          |
| S                | -1.86244114 | 0.15475001  | 2.33471618  |          |
| H                | -2.44164718 | 1.15458609  | 1.66707313  |          |
| H                | -1.95821915 | 0.78816006  | 3.50499427  |          |
| S                | 1.21979509  | -0.32173402 | -0.27352002 |          |
| H                | 0.71303305  | 0.71380605  | -0.94704307 |          |
| H                | 0.54043704  | 0.00138200  | 0.83040006  |          |
| P14              |             |             |             |          |
| S                | -1.33649710 | 1.68629513  | 1.60479112  |          |
| H                | -2.09986116 | 1.56877612  | 0.51547504  |          |
| H                | -0.27686802 | 2.08731016  | 0.89603607  |          |
| S                | -3.09008424 | -0.12058901 | -1.63977213 |          |
| H                | -4.35603534 | -0.52706204 | -1.53243912 |          |
| H                | -2.63253820 | -1.17328709 | -0.95743807 |          |
| S                | -0.70125305 | -2.21517017 | 0.91230807  |          |
| H                | -0.97647308 | -2.96805623 | 1.97874815  |          |
| H                | -0.89173707 | -1.06843208 | 1.57297712  |          |
| S                | 2.04863516  | 2.37199418  | -0.59116205 |          |
| H                | 2.50798319  | 1.11750608  | -0.55608704 |          |
| H                | 3.05206823  | 2.82506922  | 0.16204201  |          |
| S                | 3.12279824  | -1.57279512 | -0.32887702 |          |
| H                | 1.93578915  | -2.02204416 | 0.08762201  |          |
| H                | 3.04007823  | -2.23554917 | -1.48355211 |          |
| P15              |             |             |             |          |
| S                | 1.11624623  | 1.80070704  | -0.99379311 |          |
| H                | 2.33197027  | 1.36652687  | -0.65061789 |          |
| H                | 1.60307062  | 2.67619328  | -1.87462603 |          |
| S                | 0.26951454  | -1.73946677 | 0.34168317  |          |
| H                | -0.07516358 | -2.18624744 | 1.55124608  |          |
| H                | -0.36597208 | -0.57842882 | 0.52805998  |          |
| S                | 4.20069528  | -0.61573144 | 0.22129338  |          |

Aug 19, 14 16:53

si.txt

Page 7/7

|   |             |             |             |
|---|-------------|-------------|-------------|
| H | 2.98737838  | -1.17174914 | 0.28905790  |
| H | 4.54542615  | -1.35732946 | -0.83260229 |
| S | -1.84868649 | 1.62011949  | 1.07323423  |
| H | -2.73712173 | 1.45741468  | 2.05564108  |
| H | -1.15975070 | 2.53536788  | 1.75636117  |
| S | -3.80661985 | -1.14423821 | -0.69897229 |
| H | -3.49450164 | 0.06055371  | -1.18013577 |
| H | -2.53373106 | -1.54454313 | -0.73751038 |
